# Supplementary material for: One-pot synthesis of boron-doped ordered mesoporous carbons as efficient electrocatalysts for the oxygen reduction reaction
Source: Royal Society of Chemistry journal article supplement (doi:10.1039/c6ra01296e), 2016-01-01
Supplement: c6ra01296e1.pdf [file c6ra01296e1.pdf]

## Supplementary Information

### One-pot Synthesis of Boron-doped Ordered Mesoporous Carbons as Efficient Electrocatalysts for Oxygen Reduction Reaction

Jianmin Su, Xuecheng Cao, Jiao Wu, Chao Jin, Jing-Hua Tian\* and Ruizhi Yang\*

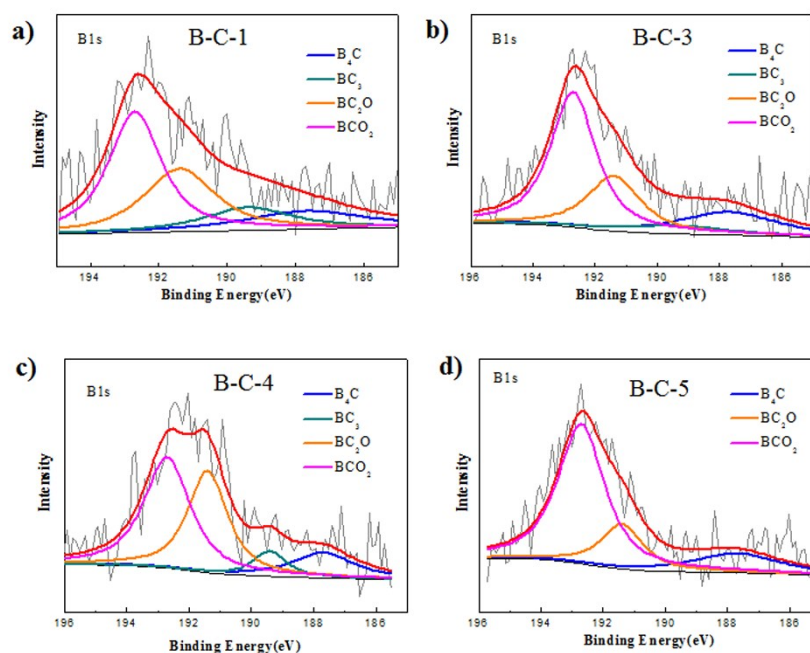

**Fig. S1** High-resolution B1s core-level XPS spectra of the a) B-C-1, b) B-C-3, c) B-C-4, d) B-C-5.

**Table S1** The ORR activity comparison of B-C-2, B<sub>3</sub>CNTs, BDC900, BOMCs-2 and B-OMC-1.

| Catalyst                                               | Onset potential                            | Half-wave potential                       | Electron transfer number | reference |
|--------------------------------------------------------|--------------------------------------------|-------------------------------------------|--------------------------|-----------|
| B-C-2 <sup>a</sup>                                     | -0.14 V vs. Ag/AgCl                        | -0.29 V vs. Ag/AgCl                       | 3.71-3.85                | This work |
| Boron-Doped CNTs (B <sub>3</sub> CNTs) <sup>b</sup>    | ~ -0.25 V vs. SCE                          | ~-0.4 V vs SCE                            | 2.5                      | [11]      |
| Boron-Doped Carbon (BDC900) <sup>c</sup>               | ~-0.199 V vs. Ag/AgCl (~ -0.005 V vs. NHE) | ~-0.264 V vs. Ag/AgCl (~ -0.07 V vs. NHE) | 3.73                     | [12]      |
| Boron-Doped OMCs (hard template, BOMCs-2) <sup>d</sup> | -0.16 V vs Ag/AgCl                         | ~ -0.4 V vs. Ag/AgCl                      | 3.86-4.0                 | [21]      |
| Boron-Doped OMCs (B-OMC-1) <sup>e</sup>                | -0.085 V vs. SCE                           | ~ -0.23 V vs. SCE                         | 2.0-2.5                  | [23]      |

Note: a, b, c, d and e were measured under 1600 rpm, 2500 rpm, 1600 rpm, 800 rpm and 1200 rpm, respectively.
